# Supplementary material
Source: Springer Nature journal article supplement (https://www.springermedizin.de/resource/supplementary/12950_2013_360_MOESM1_ESM.pdf/9557658)

**A**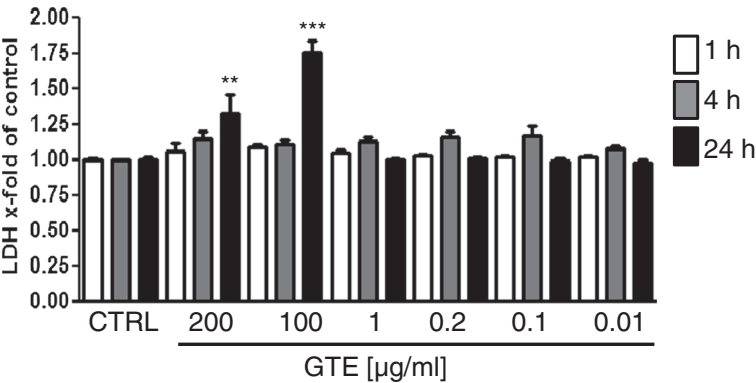**B**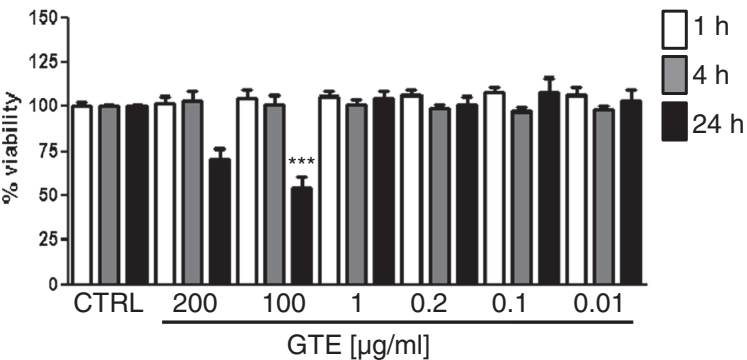

Supplement: MOESM1 [file 9557658]
